# Supplementary material for: Adaptation of ACMG/AMP guidelines for clinical classification of BMPR2 variants in Pulmonary Arterial Hypertension resolves variants of unclear pathogenicity in ClinVar
Source: bioRxiv or medRxiv preprint supplement (doi:10.1101/2024.11.24.24317862), 2024-11-26

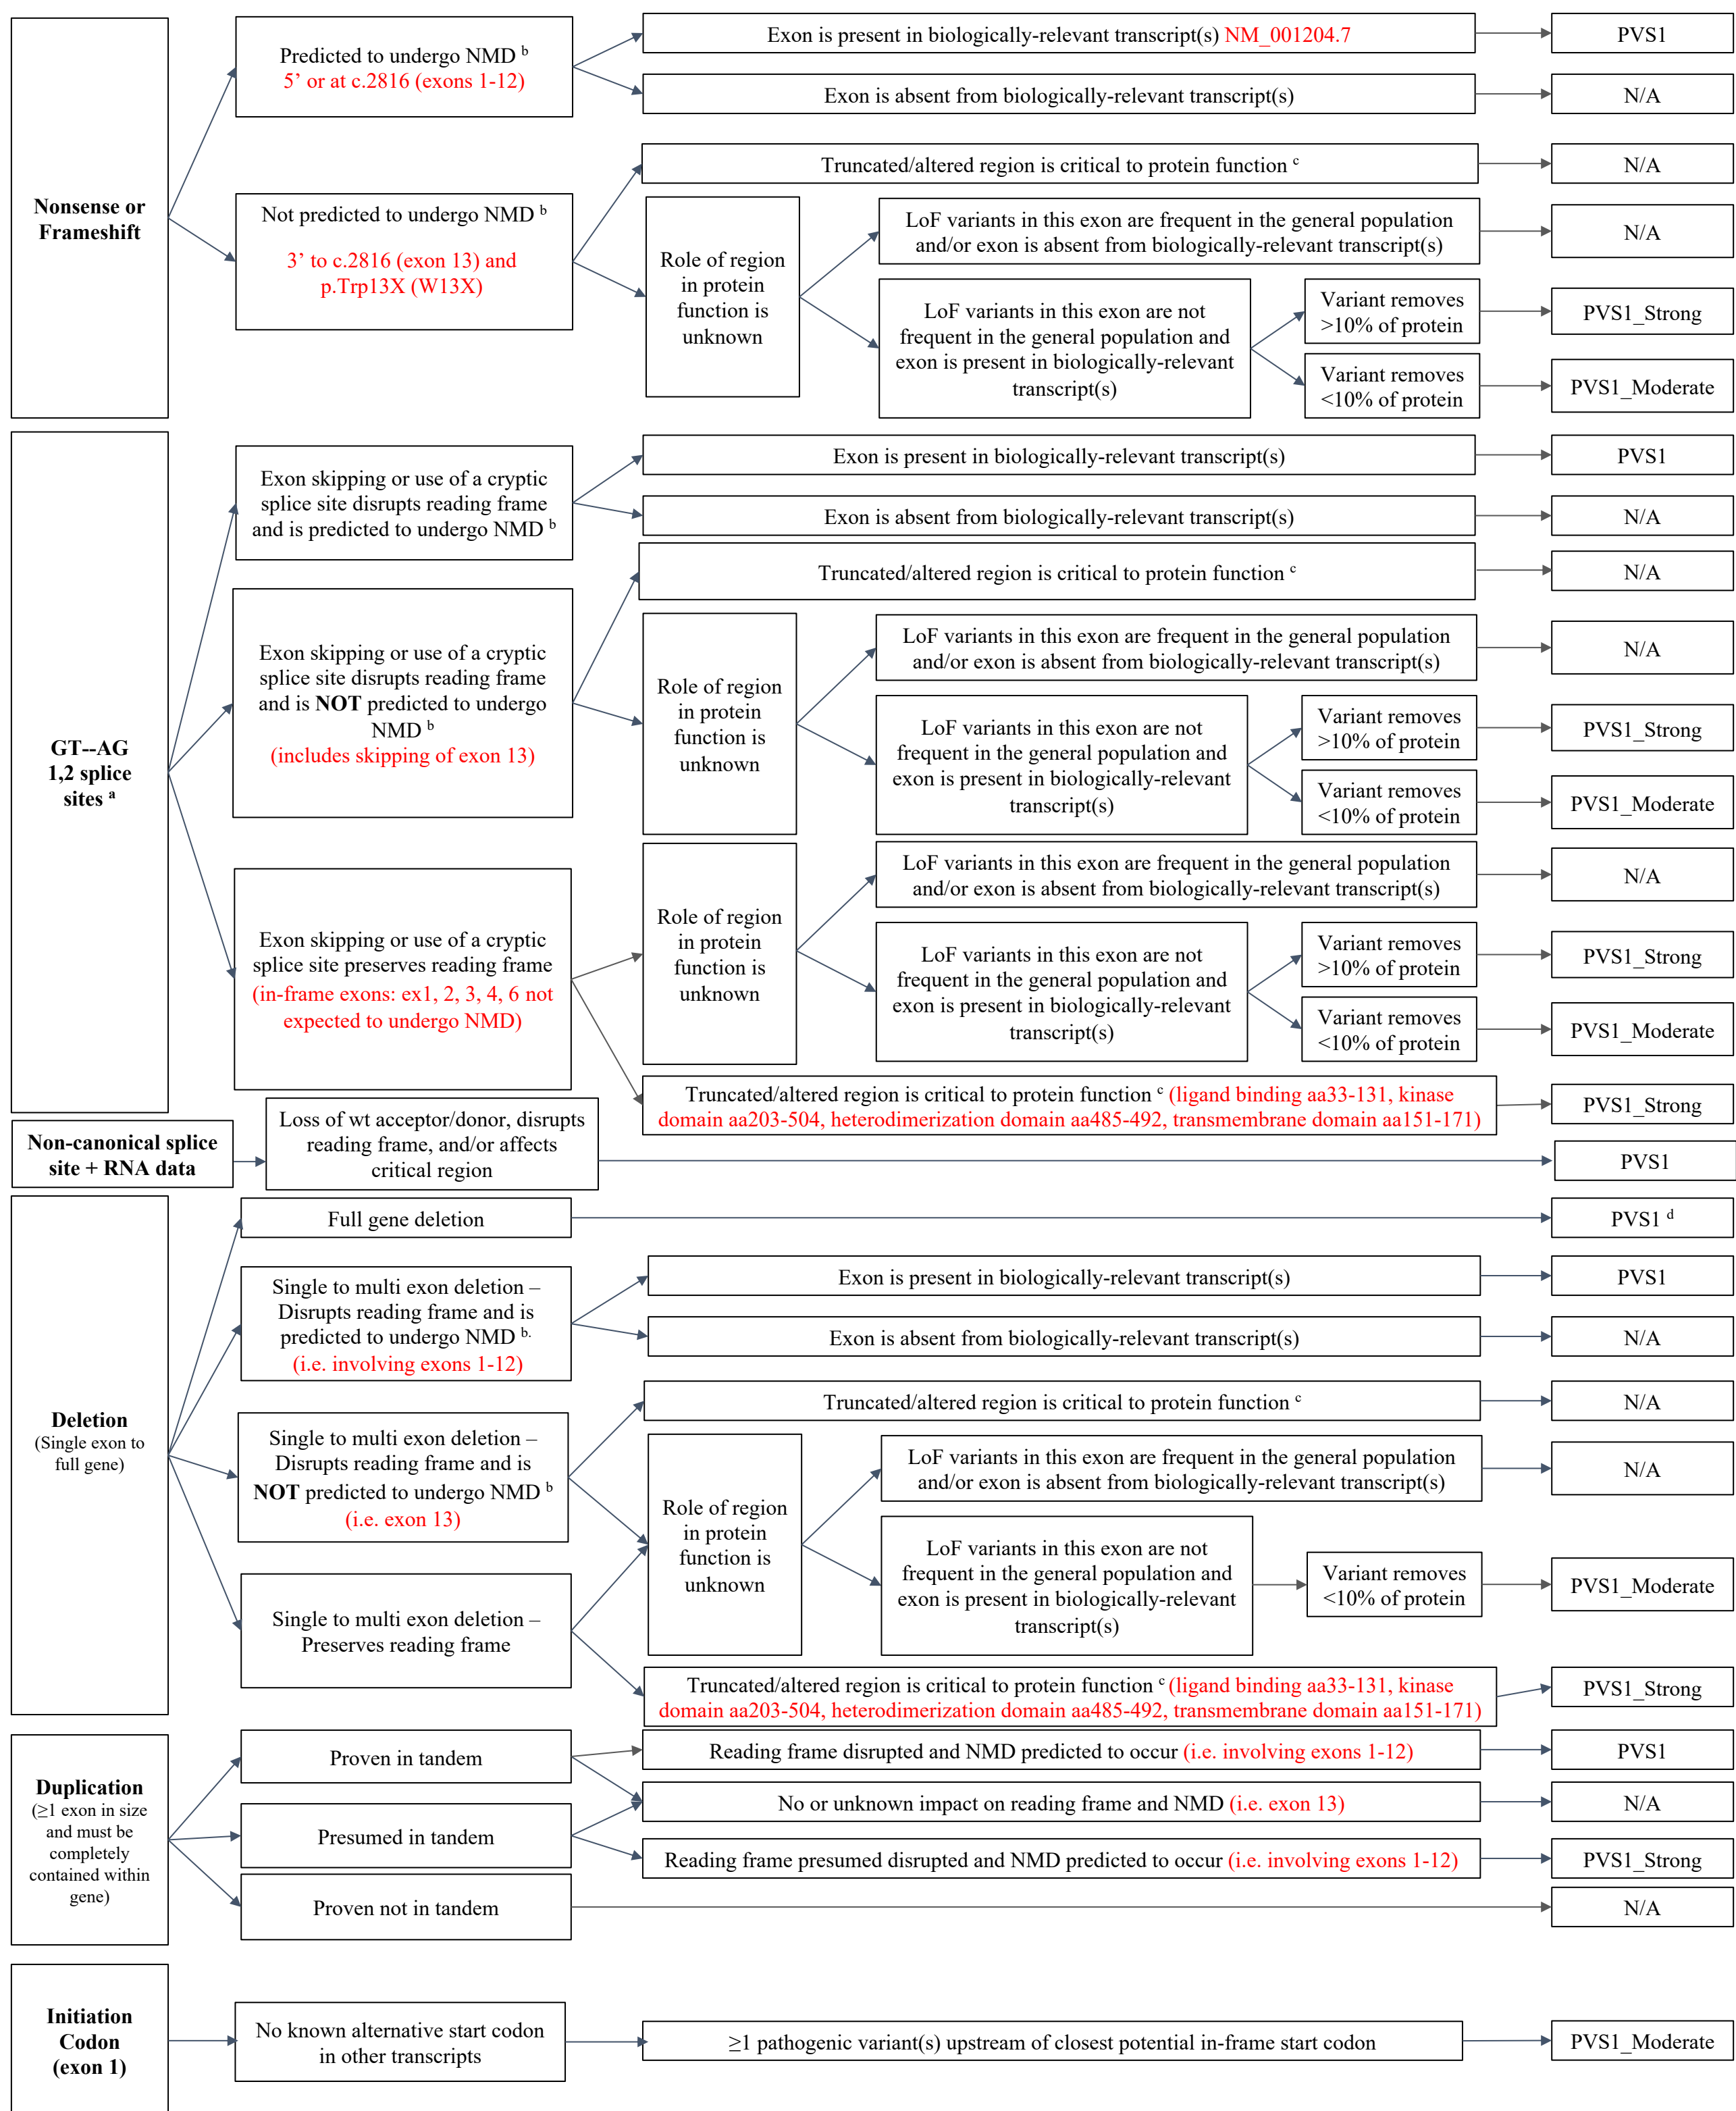

Supplement: Supplementary file [file media-1.pdf]
